# Supplementary material for: Mycoplasma genitalium Protein of Adhesion Promotes the Early Proliferation of Human Urothelial Cells by Interacting with RPL35
Source: MDPI journal article supplement (doi:10.3390/pathogens10111449), 2021-11-08
Supplement: s1 [file s1]

## Supplementary

### ***Mycoplasma genitalium* protein of adhesion promotes the early proliferation of human urothelial cells by interacting with RPL35**

***Pei Dai, Xiangying Deng, Peng Liu, Lingling Li, Dan Luo, Yating Liao, Yanhua Zeng\****

*Institute of Pathogenic Biology, Hengyang Medical College, University of South China;  
Hunan Provincial Key Laboratory for Special Pathogens Prevention and Control;  
Hunan Province Cooperative Innovation Center for Molecular Target New Drug Study,  
Hengyang 421001, P.R. China;*

**\* Corresponding author.**

**Yanhua Zeng:** Institute of Pathogenic Biology, Hengyang Medical College, University of South China; Hunan Provincial Key Laboratory for Special Pathogens Prevention and Control; Hunan Province Cooperative Innovation Center for Molecular Target New Drug Study, Hengyang 421001, P.R.China.

E-mail: [zengyihua21cn@usc.edu.cn](mailto:zengyihua21cn@usc.edu.cn)

Running title: The interaction between the *Mycoplasma genitalium* protein of adhesion and RPL35.

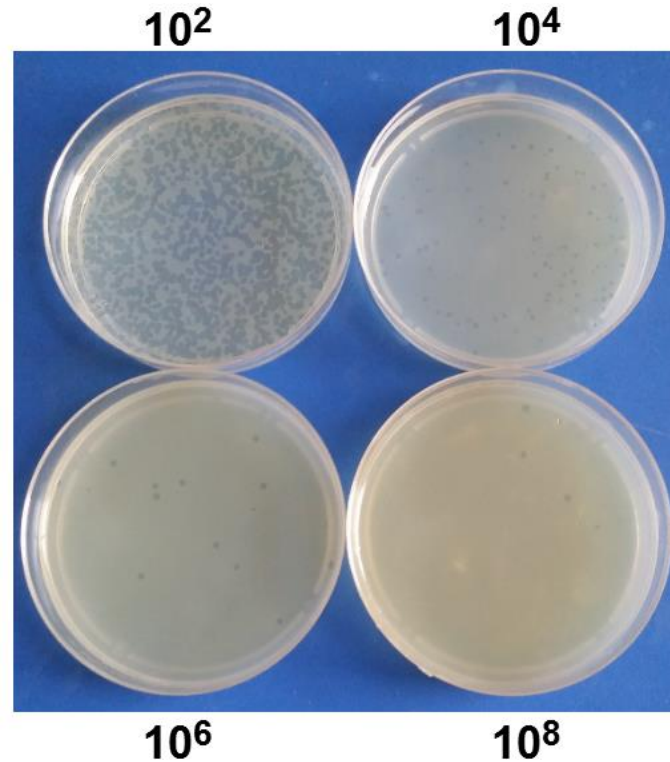

**Supplementary Figure S1.** The detection of titer for SV-HUC-1 T7 phage display cDNA library. The SV-HUC-1 T7 phage display cDNA library constructed by our research group was amplified in the host strain BLT5403. The phage library was diluted into different multiples and cultured overnight in 37°C. incubator in LB-SRB medium containing Carbenicillin. The calculated titer is  $3 \times 10^8$  pfu. The result is shown in figure 1. Lanes: The  $10^2$ ,  $10^4$ ,  $10^6$  and  $10^8$  represents different phage dilution times.

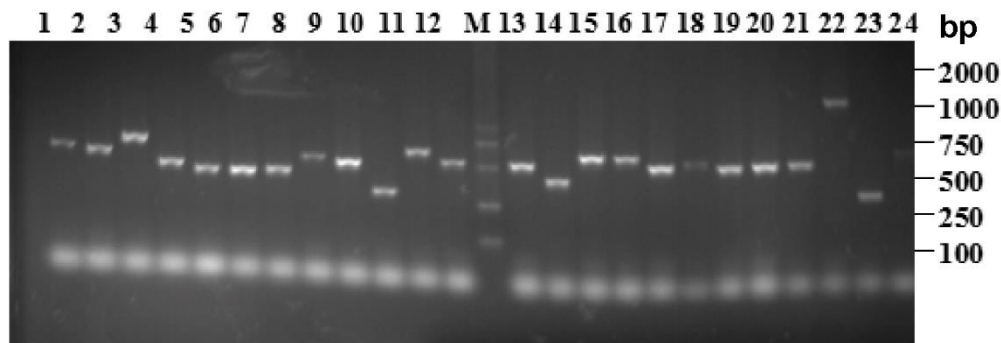

**Supplementary Figure S2.** Agarose gel electrophoresis analysis of PCR products of the displayed phages. After four rounds of panning, the final enriched specific clones were plated and single pure plaque was isolated. The cDNA inserts in these plaques were amplified by PCR using primers and 50 clones were randomly picked and out of which 32 clones got clear amplified products and Agarose gel electrophoresis analysis of PCR products for partial phages as figure 2 showed. Note: M, DNA marker; Lane1~24, Number of different phage plaques.

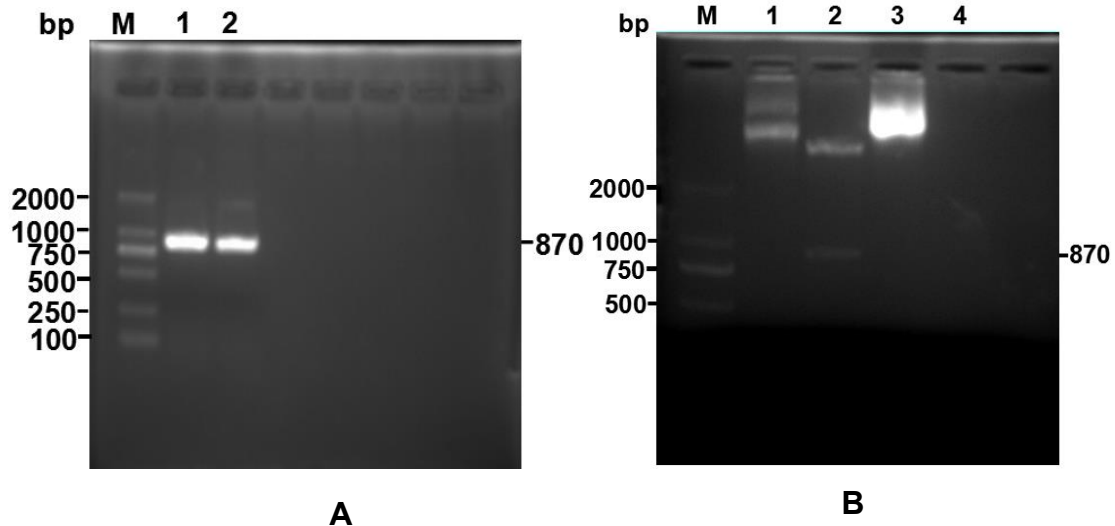

**Supplementary Figure S3.** Construction of pcDNA3.1(+)/rMgPa. Mycoplasma TGA codons were substituted with TGG (3223~4092aa). *XhoI* and *EcoRI* restriction enzymes were purchased from ThermoFisher Scientific). According to the primer design guidelines (Sangon Biotech Co, Ltd, Shanghai, China). (A) Agarose gel electrophoresis analysis of PCR products of MgPa. Note: M, DNA marker; Lane1-2, PCR product of MgPa. (B) The recombinant plasmid was verified by double-enzyme cleavage. Note: M, DNA marker; Lane1, pcDNA3.1(+)/rMgPa Products; 2, pcDNA3.1 (+) /rMgPa was digested with *EcoRI* and *XhoI*; 3, pcDNA3.1 (+) null plasmid.

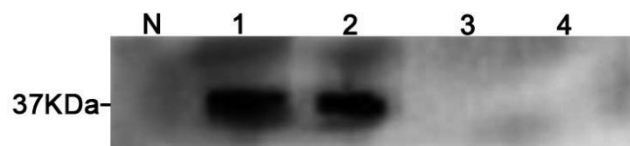

**Supplementary Figure S4.** Expression of the rMgPa proteins as detected by western blotting. The western blotting results revealed that rMgPa was detected in SV-HUC-1 cells transfected with pcDNA3.1(+)/rMgPa. By contrast, no rMgPa expression was observed in control groups. Note: N, Normal; Lane1and Lane2 transfection of SV-HUC-1cells with pcDNA3.1(+)/rMgPa. lane3, pcDNA3.1(+); Lane4, lip2000 (invitrogen). There was a distinct band observed at approximately 37kDa such as 1 and 2, whereas no band was observed for the control group as N, 3 and 4.

Homo sapiens ribosomal protein L35, mRNA (cDNA clone MGC:88597 IMAGE:4896387), complete cds

Sequence ID: [BC071915.1](#) Length: 457 Number of Matches: 1

Range 1: 1 to 445 [GenBank](#) [Graphics](#)

[▼ Next Match](#) [▲ Previous Match](#)

| Score         | Expect                                                       | Identities   | Gaps      | Strand    |
|---------------|--------------------------------------------------------------|--------------|-----------|-----------|
| 817 bits(442) | 0.0                                                          | 444/445(99%) | 0/445(0%) | Plus/Plus |
| Query 36      | GCGGCTTGTGCAGCAATGGCCAAGATCAAGGCTCGAGATCTTCGCGGGAAGAAGAAGGAG | 95           |           |           |
| Sbjct 1       | GCGGCTTGTGCAGCAATGGCCAAGATCAAGGCTCGAGATCTTCGCGGGAAGAAGAAGGAG | 60           |           |           |
| Query 96      | GAGCTGCTGAAACAGCTGGACGACCTGAAGGTGGAGCTGTCCAGCTGCGCGTGGCCAAA  | 155          |           |           |
| Sbjct 61      | GAGCTGCTGAAACAGCTGGACGACCTGAAGGTGGAGCTGTCCAGCTGCGCGTGGCCAAA  | 120          |           |           |
| Query 156     | GTGACAGGCGGTGCGGCTCCAAGCTCTCTAAGATCCGAGTCGTCCGGAATCCATTGCC   | 215          |           |           |
| Sbjct 121     | GTGACAGGCGGTGCGGCTCCAAGCTCTCTAAGATCCGAGTCGTCCGGAATCCATTGCC   | 180          |           |           |
| Query 216     | CGTGTTCACAGTTATTAACAGACTCAGAAAGAAAACCTCAGGAAATTCTACAAGGGC    | 275          |           |           |
| Sbjct 181     | CGTGTTCACAGTTATTAACAGACTCAGAAAGAAAACCTCAGGAAATTCTACAAGGGC    | 240          |           |           |
| Query 276     | AAGAAGTACAAGCCCTGGACCTGCGGCTAAGAAGACACGTGCCATGCGCGCGCGGCTC   | 335          |           |           |
| Sbjct 241     | AAGAAGTACAAGCCCTGGACCTGCGGCTAAGAAGACACGTGCCATGCGCGCGCGGCTC   | 300          |           |           |
| Query 336     | AACAAGCAGCAGGAGAACCTGAAGACCAAGAAGCAGCAGCGGAAGGAGCGGCTGTACCG  | 395          |           |           |
| Sbjct 301     | AACAAGCAGCAGGAGAACCTGAAGACCAAGAAGCAGCAGCGGAAGGAGCGGCTGTACCG  | 360          |           |           |
| Query 396     | CTGCGGAAGTACGCGGTCAAGGCTGAGGGCGCATTGTCAATAAAGCACAGCTGGCTGA   | 455          |           |           |
| Sbjct 361     | CTGCGGAAGTACGCGGTCAAGGCTGAGGGCGCATTGTCAATAAAGCACAGCTGGCTGA   | 420          |           |           |
| Query 456     | CGAAAAAAAAAAAAAAAAAAAAA                                      | 480          |           |           |
| Sbjct 421     | CAAAAAAAAAAAAAAAAAAAAAA                                      | 445          |           |           |

Sequence ID: Query\_44843 Length: 996 Number of Matches: 1

Range 1: 49 to 408 [Graphics](#)

[BC094828.1](#)

[▼ Next Match](#) [▲ Previous Match](#)

| Score         | Expect                                                      | Identities   | Gaps      | Strand    |
|---------------|-------------------------------------------------------------|--------------|-----------|-----------|
| 593 bits(321) | 7e-174                                                      | 347/360(96%) | 0/360(0%) | Plus/Plus |
| Query 1       | GCAATGGCCAAGATCAAGGCTCGAGATCTTCGCGGGAAGAAGAAGGAGAGCTGCTGAAA | 60           |           |           |
| Sbjct 49      | GCAATGGCCAAGATCAAGGCTCGAGATCTTCGCGGGAAGAAGAAGGAGAGCTGCTGAAA | 108          |           |           |
| Query 61      | CAGCTGGACGACCTGAAGGTGGAGCTGTCCAGCTGCGCGTCGCCAAAGTGACAGGCGGT | 120          |           |           |
| Sbjct 109     | CAGCTGGACGACCTGAAGGTGGAGCTGTCCAGCTGCGCGTCGCCAAAGTGACAGGCGGT | 168          |           |           |
| Query 121     | GCGGCTCCAAGCTCTCTAAGATCCGAGTCGTCCGGAATCCATTGCCCCGTGTTCTACA  | 180          |           |           |
| Sbjct 169     | GCGGCTCCAAGCTCTCTAAGATCCGAGTCGTCCGGAATCCATTGCCCCGTGTTCTACA  | 228          |           |           |
| Query 181     | GTTATTAACCAAGTCAAGGAAACCTCAGGAAATTCTACAAGGCAAGAGTACAAG      | 240          |           |           |
| Sbjct 229     | GTTATTAACCAAGTCAAGGAAACCTCAGGAAATTCTACAAGGCAAGAGTACAAG      | 288          |           |           |
| Query 241     | CCCCGACCTGCGGCTAAGAAACACACGTGCCATGCGCGCGCTCAACAAGCACGAG     | 300          |           |           |
| Sbjct 289     | CCCCGACCTGCGGCTAAGAAACACACGTGCCATGCGCGCGCTCAACAAGCACGAG     | 348          |           |           |
| Query 301     | GACAACTGAAGACCAAGAAGCAGGACCGGAAGGACGGGTGTACCGCTGCGGAACTAC   | 360          |           |           |
| Sbjct 349     | GACAACTGAAGACCAAGAAGCAGGACCGGAAGGACGGGTGTACCGCTGCGGAACTAC   | 408          |           |           |

Sequence ID: **Query\_47811** Length: **996** Number of Matches: **1**

Range 1: 23 to 408 [Graphics](#)

**BC000348.2**

[▼ Next Match](#) [▲ Previous Match](#)

| Score         | Expect                                                        | Identities   | Gaps      | Strand    |
|---------------|---------------------------------------------------------------|--------------|-----------|-----------|
| 636 bits(344) | 0.0                                                           | 372/386(96%) | 0/386(0%) | Plus/Plus |
| Query 5       | GGGCGCGCGCGTTGGCGGCTTGTGCAGCAATGGCCAAGATCAAGGCTCGAGATCTTCGCG  | 64           |           |           |
| Shjct 23      | GGGCGCGCGCGTTGGCGGCTTGTGCAGCAATGGCCAAGATCAAGGCTCGAGATCTTCGCG  | 82           |           |           |
| Query 65      | GGAAGAAGAAGGAGGAGCTGCTGAAACAGCTGGACGACCTGAAGGTGGAGCTGTCCCAGC  | 124          |           |           |
| Shjct 83      | GGAAGAAGAAGGAGGAGCTGCTGAAACAGCTGGACGACCTGAAGGTGGAGCTGTCCCAGC  | 142          |           |           |
| Query 125     | TGCGCGTCGCCAAAAGTGACAGGCGGTGCGGCCTCCAAGCTCTCTAAGATCCGAGTCGTCC | 184          |           |           |
| Shjct 143     | TGCGCGTCGCCAAAAGTGACAGGCGGTGCGGCCTCCAAGCTCTCTAAGATCCGAGTCGTCC | 202          |           |           |
| Query 185     | GGAATCCATTGCCCGTGTCTCACAGTTATTAACCAGACTCAGAAAAGAAAACCTCAGGA   | 244          |           |           |
| Shjct 203     | GGAATCCATTGCCCGTGTCTCACAGTTATTAACCAGACTCAGAAAAGAAAACCTCAGGA   | 262          |           |           |
| Query 245     | AATTCTACAAGGGCAAGAAGTACAAGCCCTGGACCTGCGGCCTAAGAAACACACGTGCCA  | 304          |           |           |
| Shjct 263     | AATTCTACAAGGGCAAGAAGTACAAGCCCTGGACCTGCGGCCTAAGAAACACACGTGCCA  | 322          |           |           |
| Query 305     | TGCGCGCGCGCTCAACAAGCACGAGGAGAACCTGAAGACCAAGAAGCAGCAACCGGAAGG  | 364          |           |           |
| Shjct 323     | TGCGCGCGCGCTCAACAAGCACGAGGAGAACCTGAAGACCAAGAAGCAGCAACCGGAAGG  | 382          |           |           |
| Query 365     | AGCGGCTGTACCCGCTGCGGAAGTAC                                    | 390          |           |           |
| Shjct 383     | ATCGGATGTACCCGCTGCGGAAGTAC                                    | 408          |           |           |

**Supplementary Figure S5.** Blast mapping of BC071915.1, BC094828.1 and BC000348.2 of RPL35 subunits with exogenous sequences.
